# Supplementary material for: Cap-free dual stimuli-responsive biodegradable nanocarrier for controlled drug release and chemo-photothermal therapy
Source: Royal Society of Chemistry journal article supplement (doi:10.1039/c8tb02698j), 2018-01-01
Supplement: c8tb02698j1.pdf [file c8tb02698j1.pdf]

## Supporting Information

### Cap-Free dual Stimuli-Responsive Biodegradable Nanocarrier for Controlled Drug Release and Chemo-Photothermal Therapy †

Fang Wang,<sup>a#</sup> Zemin Wang,<sup>a#</sup> Yansheng Li,<sup>a</sup> Liang Zhao,<sup>a</sup> Yongqiang Wen<sup>\*a</sup> and Xueji Zhang<sup>a</sup>

<sup>a</sup>Research Center for Bioengineering and Sensing Technology, School of Chemistry and Biological Engineering, University of Science and Technology Beijing, 30 Xueyuan Road, Beijing 100083, P. R. China.

\*E-mail: [wyq\\_wen@iccas.ac.cn](mailto:wyq_wen@iccas.ac.cn) <sup>#</sup>Dual Contributors

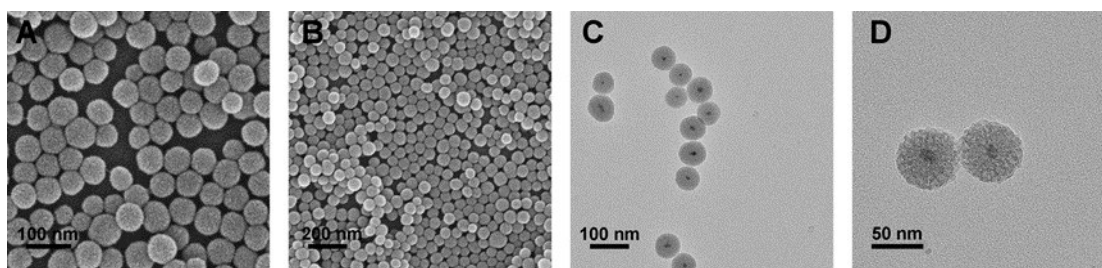

**Figure S1.** (A-B) SEM images and (C-D) TEM images of MDBCP.

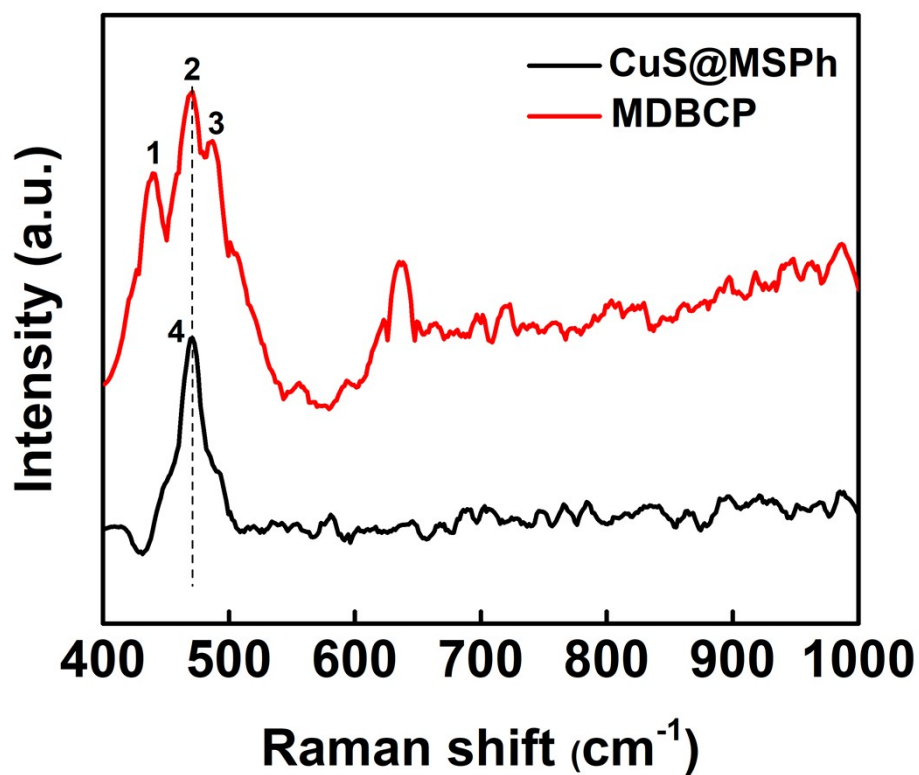

Figure S2. Raman spectra of CuS@MSPh and MDBCP.

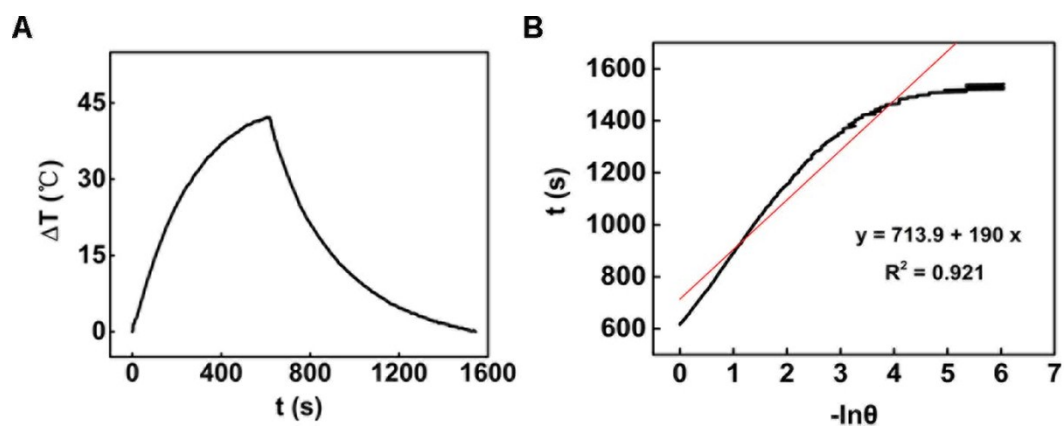

**Figure S3.** (A) A single NIR-laser on/off cycle of MDBCP. (B) cooling period vs negative natural logarithm of driving force temperature. The photothermal conversion efficiency ( $\eta$  value) of MDBCP is calculated according to the previous report.

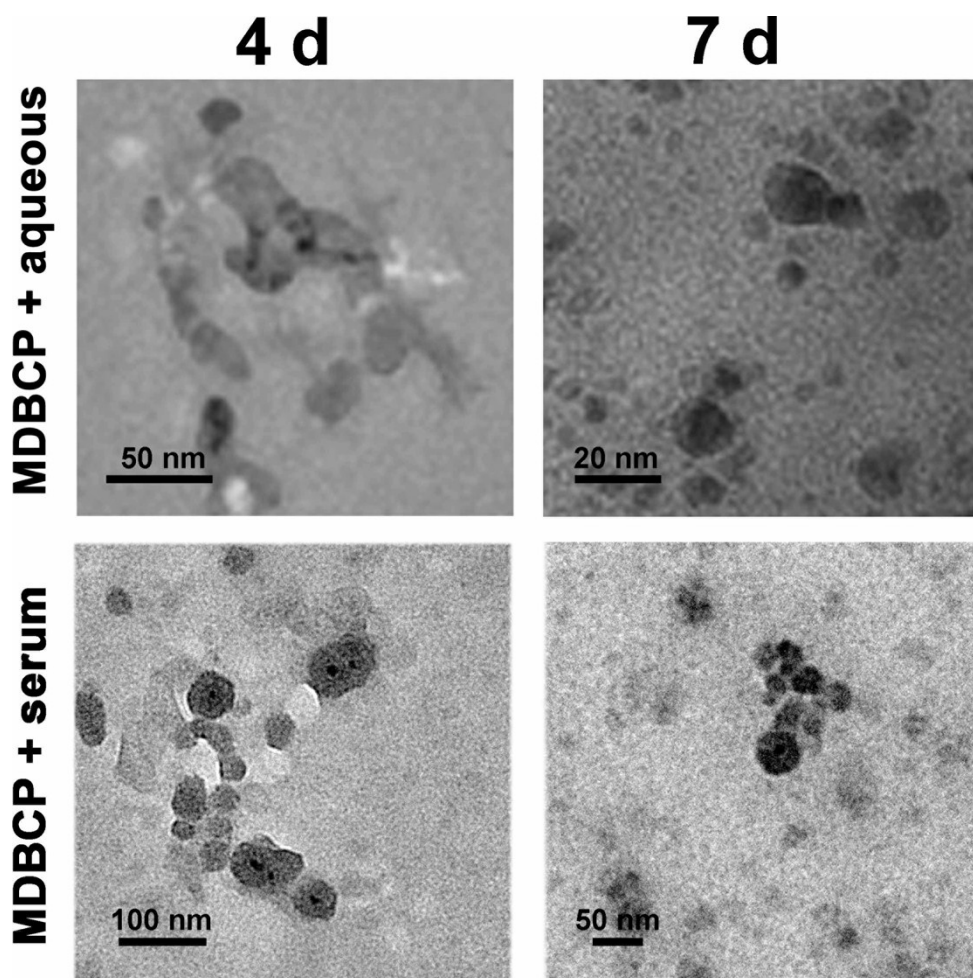

**Figure S4.** The TEM images of MDBCP stirred in 10 mM GSH (aqueous solution or serum solution) at 37 °C at different time.

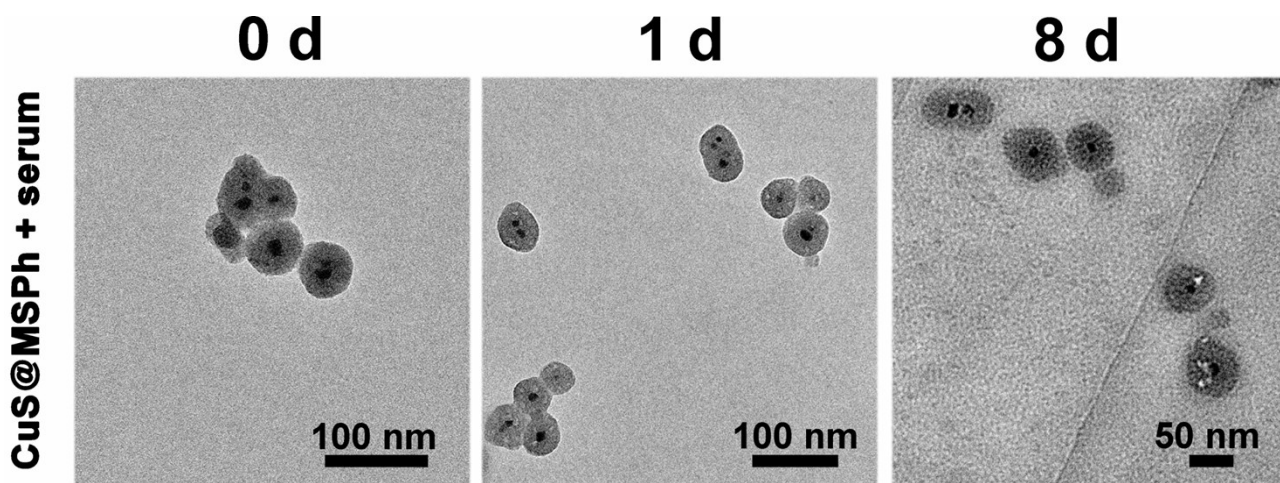

**Figure S5.** The TEM images of CuS@MSPh stirred in 10 mM GSH serum solution at 37 °C at different time.
